# Supplementary material
Source: PubMed Central journal article supplement (PMC10991976)

Figure 1B

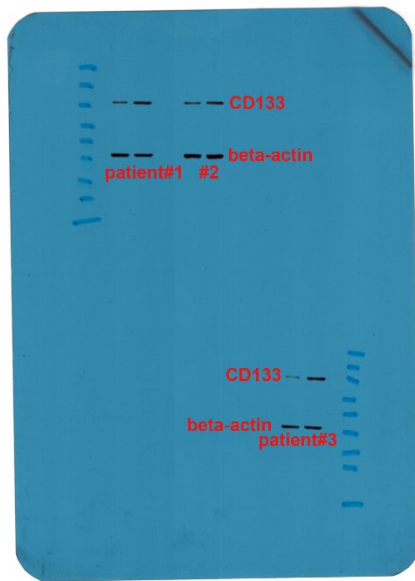

Figure 1C

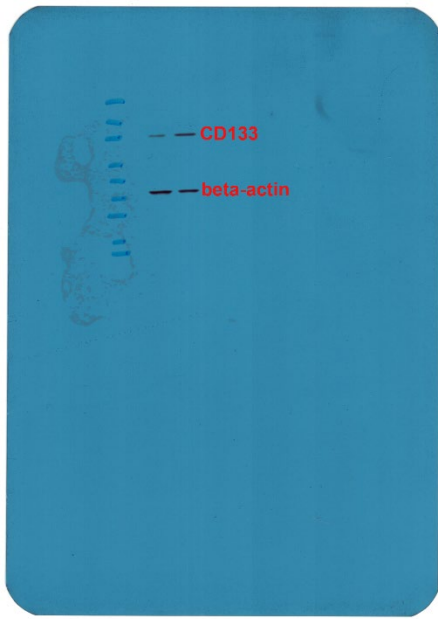

Supplement: 262_2021_2891_MOESM1_ESM.pdf [file 262_2021_2891_MOESM1_ESM.pdf]
